# Supplementary material for: Enhancement in the electrical transport properties of CaMnO3via La/Dy co-doping for improved thermoelectric performance
Source: Royal Society of Chemistry journal article supplement (doi:10.1039/d3ra03053a), 2023-01-01
Supplement: d3ra03053a1.pdf [file d3ra03053a1.pdf]

Manuscript ID: RA-ART-05-2023-003053

Enhancement in the electrical transport properties of CaMnO<sub>3</sub> via La/Dy co-doping for improved thermoelectric performance

**Supplementary information**

1. Modified Table of activation energies and tolerance factor

| <b>Concentration of Rare earth elements</b> | <b>Temperature range for calculating activation energy (K)</b> | <b>E<sub>a</sub> (meV)</b> | <b>E<sub>s</sub> (meV)</b> | <b>W<sub>p</sub></b> | <b>E<sub>p</sub></b> | <b>Tolerance Factor <i>t</i></b> |
|---------------------------------------------|----------------------------------------------------------------|----------------------------|----------------------------|----------------------|----------------------|----------------------------------|
| <b>0.025</b>                                | 370.51-771.72                                                  | 69.93                      | 49                         | 20.93                | 10.46                | 0.997                            |
| <b>0.05</b>                                 | 370.44-924.28                                                  | 51.42                      | 40.96                      | 10.46                | 5.23                 | 0.990                            |
| <b>0.075</b>                                | 368.84-570.42                                                  | 40.05                      | 33.81                      | 6.24                 | 3.12                 | 0.984                            |
| <b>0.1</b>                                  | 370.84-1075.85                                                 | 40.2                       | 32.38                      | 7.82                 | 3.91                 | 0.977                            |
